# Supplementary material for: Activation of Glutamate Transporter-1 (GLT-1) Confers Sex-Dependent Neuroprotection in Brain Ischemia
Source: MDPI journal article supplement (doi:10.3390/brainsci11010076), 2021-01-08
Supplement: s1 [file s1 › brainsci-1061436-supplementary.pdf]

# Activation of Glutamate Transporter-1 (GLT-1) Confers Sex-Dependent Neuroprotection in Brain Ischemia

Flavia A. Tejeda-Bayron <sup>1</sup>, David E. Rivera-Aponte <sup>2</sup>, Christian J. Malpica-Nieves <sup>3</sup>, Gerónimo Maldonado-Martínez <sup>4</sup>, Héctor M. Maldonado <sup>5</sup>, Serguei N. Skatchkov <sup>6</sup> and Misty J. Eaton <sup>7\*</sup>

<sup>1</sup> Department of Biochemistry School of Medicine Universidad Central del Caribe; 415ftejeda@uccaribe.edu

<sup>2</sup> Department of Biochemistry School of Medicine Universidad Central del Caribe; david.rivera@uccaribe.edu

<sup>3</sup> Department of Biochemistry School of Medicine Universidad Central del Caribe; 415cmalpica@uccaribe.edu

<sup>4</sup> School of Chiropractor Universidad Central del Caribe; geronimo.maldonado@gmail.com

<sup>5</sup> Department of Pharmacology School of Medicine Universidad Central del Caribe; hmaldonado1@gmail.com

<sup>6</sup> Department of Physiology School of Medicine Universidad Central del Caribe; serguei.skatchkov@uccaribe.edu

<sup>7</sup> Department of Biochemistry School of Medicine Universidad Central del Caribe; misty.eaton@uccaribe.edu

## Supplementary Figures

a.

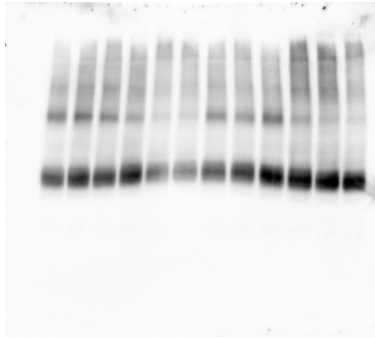

b.

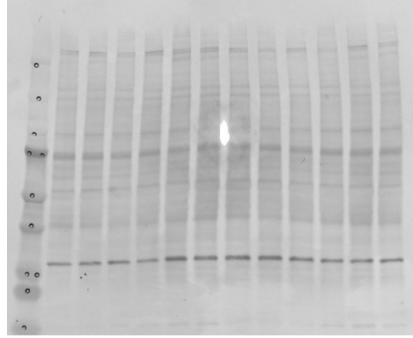

c.

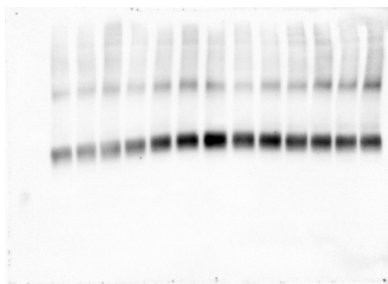

d.

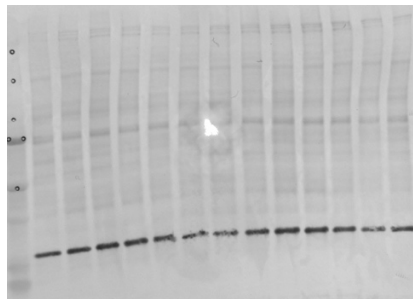

e.

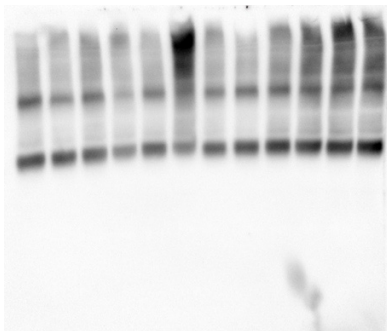

f.

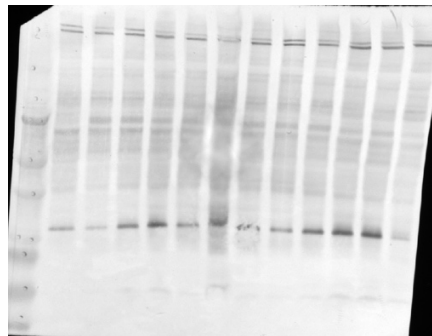

**Supplemental Figure S1: Expression of GLT-1 in male brains after a single injection of vehicle or LDN/OSU 0212320 (LDN).** Full length Western blots showing GLT-1 expression in male brain 24 (a), 48 (c) and 72 (e) hours after vehicle or LDN 40 mg/kg treatment. India Ink staining showing total protein concentration for Western Blots performed in male brain 24 (b), 48 (d), and 72 (f) hours after vehicle or LDN 40mg/kg treatment.

**a.**

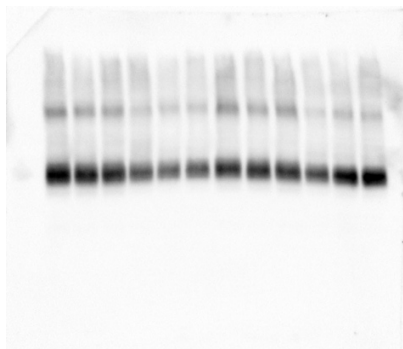

**b.**

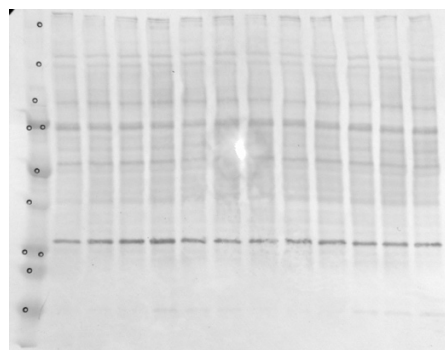

**c.**

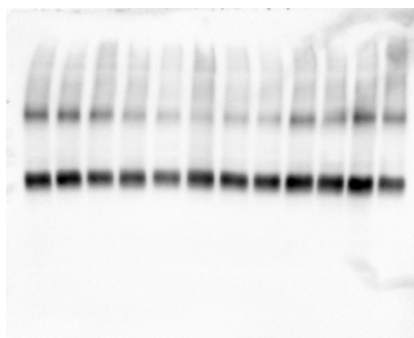

**d.**

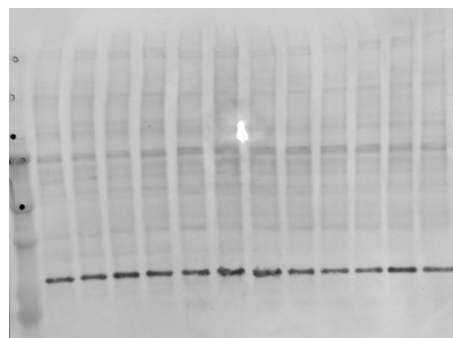

**e.**

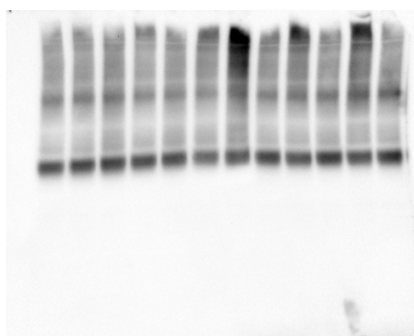

**f.**

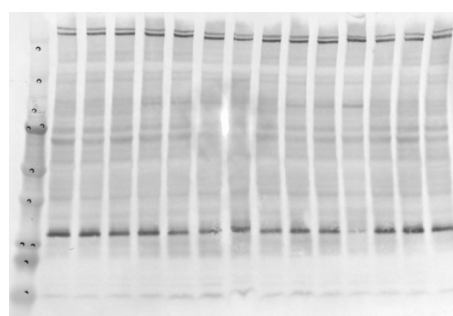

**Supplemental Figure S2: Expression of GLT-1 in female brains after a single injection of vehicle or LDN/OSU 0212320 (LDN).** Full length Western blots showing GLT-1 expression in female brain 24 (a), 48 (c) and 72 (e) hours after vehicle or LDN 40 mg/kg treatment. India Ink staining showing total protein concentration for Western Blots performed in female brain 24 (b), 48 (d), and 72 (f) hours after vehicle or LDN 40mg/kg treatment.

**a.**

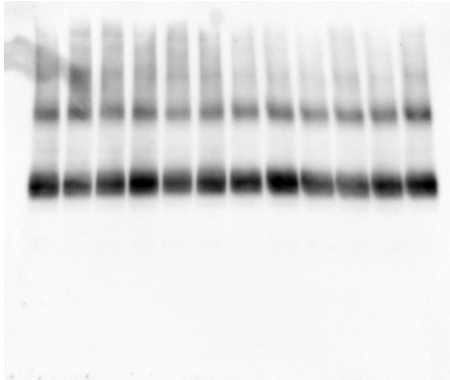

**b.**

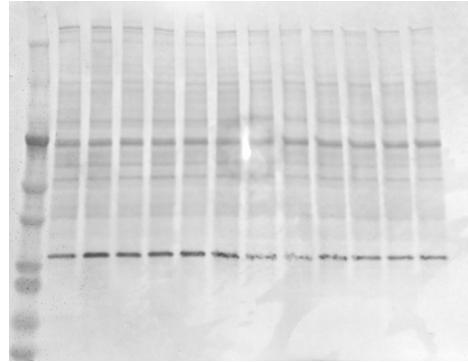

**Supplemental Figure S3: Expression of GLT-1 in female brain cortex after different doses of LDN/OSU 0212320 (LDN).** (a) Full length Western blot showing GLT-1 expression in the cortical region of female brains 24 hours after vehicle or 40 mg/kg, 80 mg/kg and 100 mg/kg LDN. (b) India Ink staining showing total protein concentration for Western Blot performed in female brain cortex after different doses of LDN-OSU 0232120 (LDN).
